# Supplementary material for: Potential Value of Visfatin, Omentin-1, Nesfatin-1 and Apelin in Renal Cell Carcinoma (RCC): A Systematic Review and Meta-Analysis
Source: MDPI journal article supplement (doi:10.3390/diagnostics12123069), 2022-12-06
Supplement: s1 [file s1]

# Visfatin, Omentin-1, Nesfatin-1 and Apelin Potential Value in Renal Cell Carcinoma (RCC): A Systematic Review and Meta-Analysis

Sugania Malar Chinapayan <sup>1</sup>, Shanggar Kuppusamy <sup>1</sup>, Ning Yi Yap <sup>2</sup>, Komathi Perumal <sup>3</sup>, Glenda Gobe <sup>4,5,6</sup> and Retnagow Rajandram <sup>1,\*</sup>

<sup>1</sup> Department of Surgery, Faculty of Medicine, Universiti Malaya, Kuala Lumpur, Malaysia

<sup>2</sup> Laboratory, Subang Jaya Medical Centre, Selangor, Malaysia

<sup>3</sup> Epink health Sdn Bhd, Shah Alam, Selangor

<sup>4</sup> NHMRC CKD CRE (CKD.QLD), The University of Queensland, Brisbane 4067, Australia

<sup>5</sup> Faculty of Medicine, The University of Queensland, Brisbane 4067, Australia

<sup>6</sup> Kidney Disease Research Collaborative, Translational Research Institute, Princess Alexandra Hospital, The University of Queensland, Brisbane 4102, Australia

\* Correspondence: retnagowri@ummc.edu.my

## Supplementary Materials

Table S1. REMARK guideline.

|                                                   |  |
|---------------------------------------------------|--|
| Marker description                                |  |
| Patient characteristics                           |  |
| Information about treatment                       |  |
| Biological material & preservation method         |  |
| Assay method                                      |  |
| Sample selection & follow-up time                 |  |
| Clinical endpoint definition                      |  |
| Variables included in analysis                    |  |
| Rational for sample size                          |  |
| Specification of statistical methods              |  |
| Handling of marker values                         |  |
| Description of flow of patients through study     |  |
| Basic demographic characteristics                 |  |
| Relation marker to standard variables             |  |
| Univariable analysis                              |  |
| Multivariable analysis                            |  |
| Marker & standard variables                       |  |
| Further investigations                            |  |
| Interpretations of results & limitations of study |  |
| Implications for further research                 |  |
| Score                                             |  |

---

| REMARK item | 1 | 2 | 3 | 4 | 5 | 6 | 7 | 8 | 9 | 10 | 11 | 12 | 13 | 14 | 15 | 16 | 17 | 18 | 19 | 20 | SCORE |
|-------------|---|---|---|---|---|---|---|---|---|----|----|----|----|----|----|----|----|----|----|----|-------|
|-------------|---|---|---|---|---|---|---|---|---|----|----|----|----|----|----|----|----|----|----|----|-------|

REFEREN  
CE

TITLE

---

|                                                                                                                                                                |                            |     |     |   |     |   |     |     |     |   |     |     |     |   |   |   |     |     |     |     |     |         |         |
|----------------------------------------------------------------------------------------------------------------------------------------------------------------|----------------------------|-----|-----|---|-----|---|-----|-----|-----|---|-----|-----|-----|---|---|---|-----|-----|-----|-----|-----|---------|---------|
| Tao R et al, 2020                                                                                                                                              |                            |     |     |   |     |   |     |     |     |   |     |     |     |   |   |   |     |     |     |     |     |         |         |
| Nucleobindin-2 enhances the epithelial-mesenchymal transition in renal cell carcinoma                                                                          |                            | 0.5 | 1   | 0 | 1   | 1 | 0   | 1   | 0.5 | 1 | 1   | 1   | 0   | 0 | 1 | 0 | 0   | 1   | 0.5 | 0.5 | 0.5 | 11.5/20 |         |
| High NUCB2 expression level represents an independent negative prognostic factor in Chinese cohorts of non-metastatic clear cell renal cell carcinoma patients | Fu H et al, 2017           | 1   | 1   | 0 | 0   | 1 | 1   | 1   | 0   | 1 | 1   | 1   | 1   | 1 | 1 | 1 | 1   | 0.5 | 0   | 1   | 0.5 | 18/20   |         |
| Nucleobindin 2 expression is an independent prognostic factor for clear cell renal cell carcinoma                                                              | Qi C et al,2015            | 1   | 0.5 | 0 | 0   | 1 | 0.5 | 1   | 0   | 1 | 1   | 0.5 | 0.5 | 1 | 1 | 1 | 1   | 0.5 | 0.5 | 1   | 0.5 | 13.5/20 |         |
| Apelin and apelin receptor expression in renal cell carcinoma                                                                                                  | Tolkach Y et al, 2019      | 1   | 0   | 0 | 0.5 | 1 | 0.5 | 0.5 | 0   | 1 | 0.5 | 1   | 1   | 1 | 1 | 1 | 0.5 | 1   | 0.5 | 1   | 0.5 | 1.35/20 |         |
| Association of leptin, visfatin, apelin, resistin and adiponectin with clear cell renal cell carcinoma                                                         | Zhang HP et al, 2017       | 1   | 1   | 0 | 1   | 1 | 0   | 0   | 0   | 1 | 1   | 1   | 0   | 0 | 0 | 0 | 0   | 1   | 0   | 1   | 1   | 10/20   |         |
| Increased Nicotinamide Phosphoribosyltransferase and Cystathionine-β-Synthase in Renal Oncocytomas, Renal Urothelial Carcinoma, and Renal Clear Cell Carcinoma | Shackelford RE et al, 2017 | 0   | 1   | 0 | 0   | 1 | 0   | 1   | 0   | 1 | 1   | 1   | 1   | 1 | 1 | 1 | 0   | 0   | 0   | 0   | 0.5 | 1       | 10.5/20 |

|                                                                                                                                            |                         |     |   |   |   |   |     |   |   |   |   |   |     |     |   |   |   |     |     |   |   |       |
|--------------------------------------------------------------------------------------------------------------------------------------------|-------------------------|-----|---|---|---|---|-----|---|---|---|---|---|-----|-----|---|---|---|-----|-----|---|---|-------|
| Identifying the emerging role of adipokine as a diagnostic and prognostic biomarker of renal cell carcinoma                                | Choi SH et al, 2016     | 0.5 | 1 | 0 | 1 | 0 | 0.5 | 0 | 0 | 1 | 1 | 1 | 1   | 1   | 1 | 0 | 0 | 0.5 | 0.5 | 1 | 1 | 12/20 |
| circ_001504 promotes the development of renal cell carcinoma by sponging microRNA-149 to quaincrease NUCB2                                 | Rui Xin et al, 2020     | 1   | 0 | 1 | 1 | 1 | 0   | 0 | 0 | 1 | 1 | 1 | 0   | 0   | 0 | 1 | 0 | 0   | 0   | 1 | 1 | 10/20 |
| Identification of biomarkers of clear cell renal cell carcinoma by bioinformatics analysis                                                 | Zhang N et al, 2020     | 0   | 0 | 0 | 0 | 1 | 0   | 1 | 1 | 1 | 1 | 1 | 0.5 | 1   | 0 | 1 | 0 | 0   | 0   | 1 | 1 | 11/20 |
| Construct a circRNA/miRNA/mRNA regulatory network to explore potential pathogenesis and therapy options of clear cell renal cell carcinoma | Shuheng Bai et al, 2020 | 1   | 0 | 0 | 0 | 0 | 0   | 1 | 1 | 1 | 1 | 1 | 0   | 0   | 0 | 1 | 0 | 1   | 1   | 1 | 1 | 11/20 |
| Impact of novel oncogenic pathways regulated by antitumor miR-451a in renal cell carcinoma                                                 | Yamada Y et al, 2018    | 1   | 1 | 0 | 0 | 1 | 0   | 0 | 1 | 1 | 1 | 1 | 0   | 1   | 1 | 1 | 0 | 0   | 0   | 1 | 0 | 11/20 |
| Circulating levels of adipocytokine omentin-1 in patients with renal cell cancer                                                           | Shen et al., 2016       | 1   | 1 | 0 | 1 | 1 | 0   | 1 | 1 | 1 | 1 | 1 | 0   | 0.5 | 1 | 0 | 0 | 0   | 0   | 1 | 1 | 12.5  |

Table S2. ARRIVE guideline

|                                                                                       |                   | title | abstract | Intro-background | Intro-objective | Method-ethical statement | Method-study design | Method-experimental procedure | Method-experimental animal analysis | Method-housing and husbandry | Method-sample size | Method-allocating animal to experimental group | Method-experimental outcome | Method-statistical method characteristics | Result-base line data | Results-numbers analysed | Result-outcome and estimation | Result-adverse event | interpretation/scientific implication | Discussion-generalization | Discussion-funding | Score |
|---------------------------------------------------------------------------------------|-------------------|-------|----------|------------------|-----------------|--------------------------|---------------------|-------------------------------|-------------------------------------|------------------------------|--------------------|------------------------------------------------|-----------------------------|-------------------------------------------|-----------------------|--------------------------|-------------------------------|----------------------|---------------------------------------|---------------------------|--------------------|-------|
| ARRIVE item                                                                           | REFERENCE         | 1     | 2        | 3                | 4               | 5                        | 6                   | 7                             | 8                                   | 9                            | 10                 | 11                                             | 12                          | 13                                        | 14                    | 15                       | 16                            | 17                   | 18                                    | 19                        | 20                 | SCORE |
| TITLE                                                                                 |                   |       |          |                  |                 |                          |                     |                               |                                     |                              |                    |                                                |                             |                                           |                       |                          |                               |                      |                                       |                           |                    |       |
| Nucleobindin-2 enhances the epithelial-mesenchymal transition in renal cell carcinoma | Tao R et al, 2020 | 1     | 1        | 1                | 1               | 2                        | 1                   | 2                             | 2                                   | 2                            | 1                  | 1                                              | 2                           | 1                                         | 1                     | 0                        | 1                             | 0                    | 0                                     | 1                         | 2                  | 17/20 |

Table S3. Quality assessment tools for in-vitro studies adapted items from Nature.

|                                                                                       |                   | Sample Selection & Experimental Setup |                   |                         |                  |                      |                |                                     | Reagents & Cells    |                |                   |                            | Sample Size             |                       | Allocation to groups                          | Allocation on Concealment-experiment          | Blinded Assessment of Outcome | Attrition                      |
|---------------------------------------------------------------------------------------|-------------------|---------------------------------------|-------------------|-------------------------|------------------|----------------------|----------------|-------------------------------------|---------------------|----------------|-------------------|----------------------------|-------------------------|-----------------------|-----------------------------------------------|-----------------------------------------------|-------------------------------|--------------------------------|
|                                                                                       |                   | sample collection                     | experimental unit | Experimental replicates | sex of the cells | source of cell lines | authentication | tested for mycoplasma contamination | Tyoes of cell lines | passage number | Profiled antibody | Discription of sample size | Sample size calculation | methods of allocation | investigators blinded to the group allocation | investigators blinded to the group allocation | Sample excluded               | exclusion criteria pre-defined |
| TITLE                                                                                 | REFERENCE         |                                       |                   |                         |                  |                      |                |                                     |                     |                |                   |                            |                         |                       |                                               |                                               |                               |                                |
| Nucleobindin-2 enhances the epithelial-mesenchymal transition in renal cell carcinoma | Tao R et al, 2020 | Y                                     | Y                 | Y                       | Y                | Y                    | N/A            | N/A                                 | Y                   | N              | Y                 | Y                          | N                       | UN                    | Y                                             | Y                                             | N                             | N                              |
| A novel function of NUCB2 in promoting the development and                            | Xu H et al, 2018  | Y                                     | Y                 | Y                       | N                | Y                    | N/A            | N/A                                 | Y                   | N              | UC                | Y                          | N                       | Y                     | Y                                             | Y                                             | N                             | N                              |

---

invasion of renal cell  
carcinoma

---
